# Supplementary figures and images for: Muscle Oxygen Supply and Use in Type 1 Diabetes, From Ambient Air to the Mitochondrial Respiratory Chain: Is There a Limiting Step?
Source: Oxford University Press journal article supplement (doi:10.2337/dc19-1125), 2019-10-21

# SUPPLEMENTARY DATA

## Supplementary Figure S1

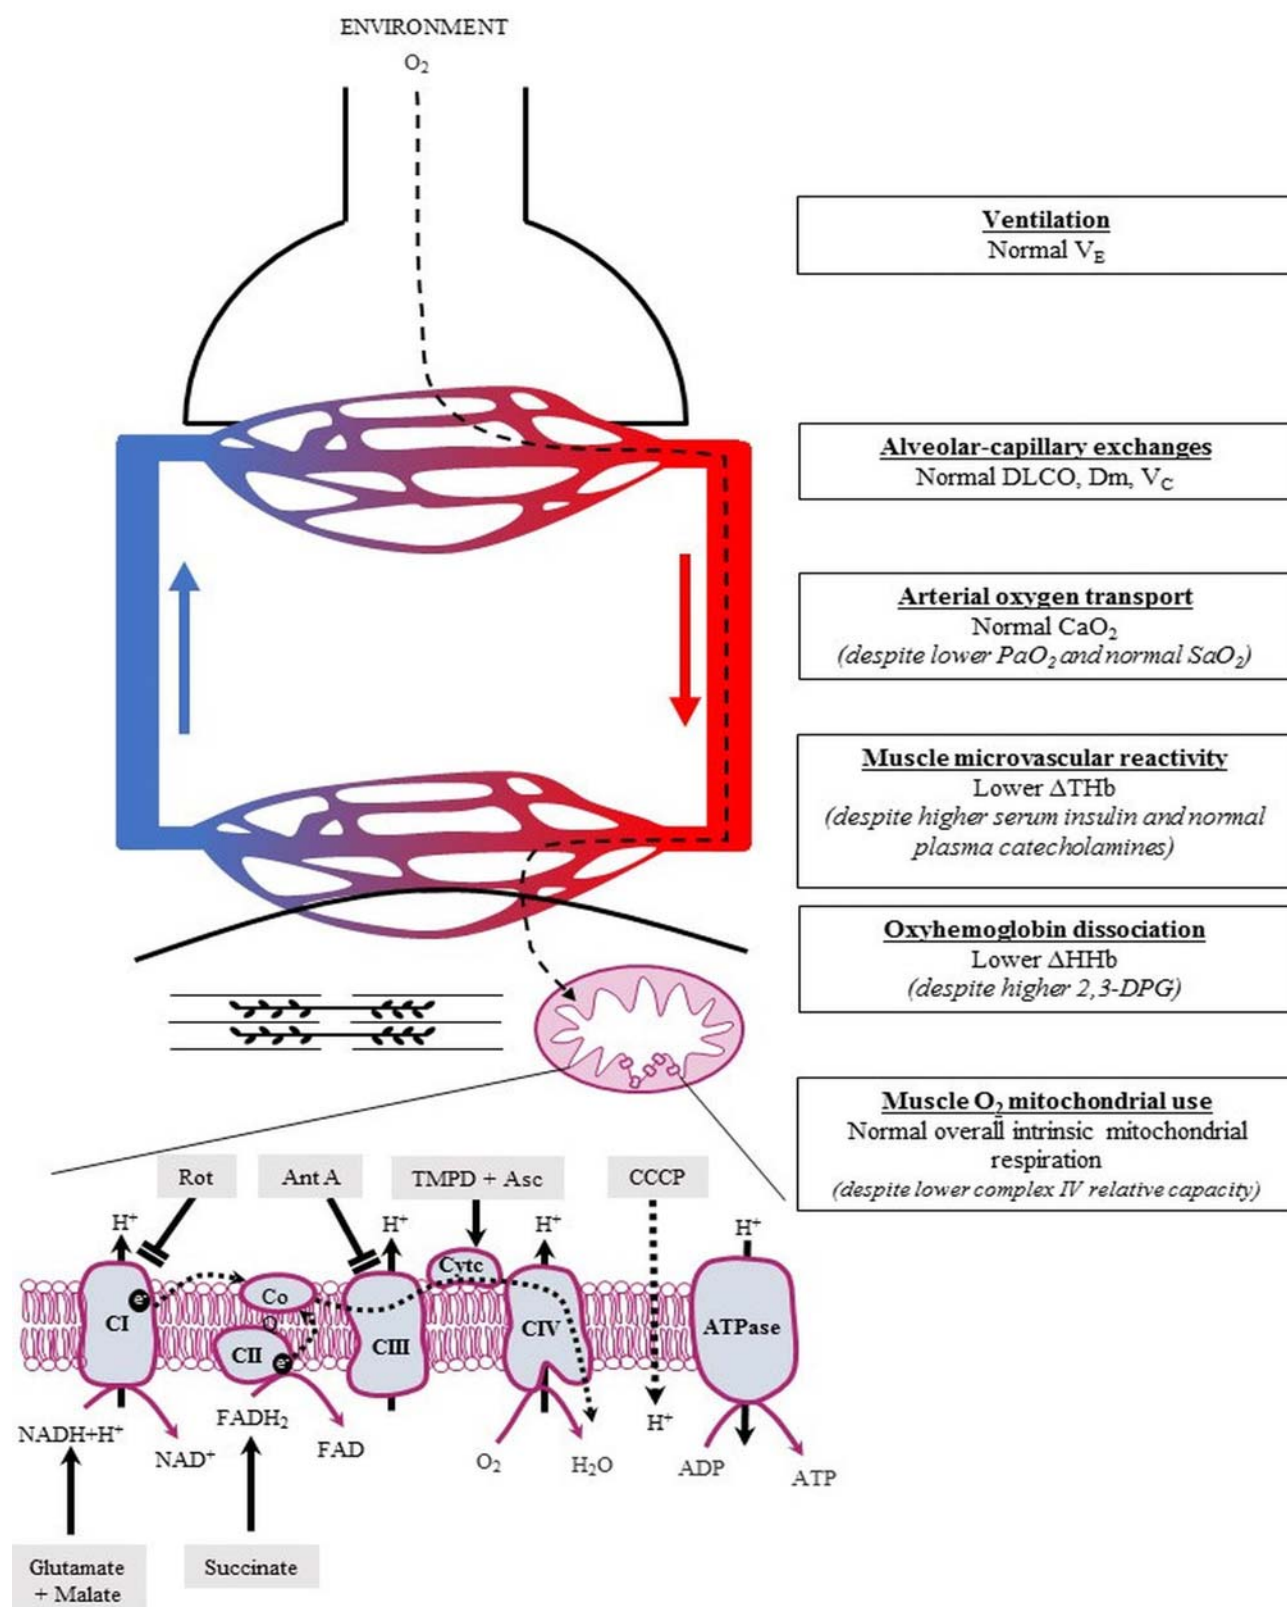

Supplement: dc191125supplementarydata.pdf [file dc191125supplementarydata.pdf]
